# Supplementary material for: Mechanism insight into the photocatalytic degradation of fluoroquinolone antibiotics by the ZIF-8@Bi2MoO6 heterojunction
Source: Royal Society of Chemistry journal article supplement (doi:10.1039/d2en00219a), 2022-01-01
Supplement: d2en00219a1.pdf [file d2en00219a1.pdf]

## Electronic Supplementary Information

Table S1. Chemical structures of FQs being used as model organic pollutant

| FQs                    | Structure                                                                          | $\lambda_{\max}$<br>(nm) | MW<br>(g/mol) | Solubility<br>(g/L) | pKa                                               | Existing                                                         |
|------------------------|------------------------------------------------------------------------------------|--------------------------|---------------|---------------------|---------------------------------------------------|------------------------------------------------------------------|
| Ofloxacin<br>(OFX)     | 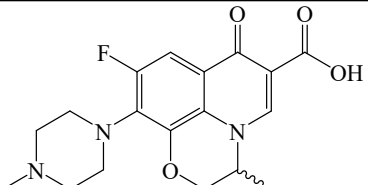  | 291                      | 361.36        | 10.8                | pKa <sub>1</sub> =6.1;<br>pKa <sub>2</sub> =8.28  | OFX <sup>+</sup> , OFX <sup>-</sup><br>OFX <sup>Zwitterion</sup> |
| Levofloxacin<br>(LFX)  |   | 297                      | 361.36        | 1.5                 | pKa <sub>1</sub> =6.24;<br>pKa <sub>2</sub> =8.74 | LFX <sup>+</sup> , LFX <sup>-</sup><br>LFX <sup>Zwitterion</sup> |
| Ciprofloxacin<br>(CFX) |  | 278                      | 331.35        | 1,0                 | pKa <sub>1</sub> =6.09;<br>pKa <sub>2</sub> =8.62 | CFX <sup>+</sup> , CFX <sup>-</sup><br>CFX <sup>Zwitterion</sup> |

Table S2. Intermediate product of ofloxacin in BIZ/Na<sub>2</sub>S<sub>2</sub>O<sub>8</sub>/Vis system identified by LC-ESI-QTOF-MS

| Compound        | m/z | Molecular formula                                              | Molecular structure<br>Retention time                                                |
|-----------------|-----|----------------------------------------------------------------|--------------------------------------------------------------------------------------|
| M <sub>1</sub>  | 393 | C <sub>18</sub> H <sub>20</sub> FN <sub>3</sub> O <sub>6</sub> | 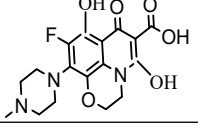   |
| M <sub>2</sub>  | 347 | C <sub>17</sub> H <sub>18</sub> FN <sub>3</sub> O <sub>4</sub> |    |
| M <sub>3</sub>  | 329 | C <sub>17</sub> H <sub>19</sub> N <sub>3</sub> O <sub>4</sub>  |    |
| M <sub>4</sub>  | 277 | C <sub>13</sub> H <sub>10</sub> FN <sub>2</sub> O <sub>4</sub> |    |
| M <sub>5</sub>  | 231 | C <sub>12</sub> H <sub>11</sub> FN <sub>2</sub> O <sub>2</sub> |   |
| M <sub>6</sub>  | 256 | C <sub>10</sub> H <sub>7</sub> FO <sub>6</sub>                 |  |
| M <sub>7</sub>  | 238 | C <sub>10</sub> H <sub>8</sub> NO <sub>6</sub>                 |  |
| M <sub>8</sub>  | 312 | C <sub>17</sub> H <sub>18</sub> N <sub>3</sub> O <sub>3</sub>  |  |
| M <sub>9</sub>  | 261 | C <sub>13</sub> H <sub>10</sub> FN <sub>2</sub> O <sub>3</sub> |  |
| M <sub>10</sub> | 212 | C <sub>12</sub> H <sub>11</sub> N <sub>2</sub> O <sub>2</sub>  |  |
| M <sub>11</sub> | 224 | C <sub>10</sub> H <sub>6</sub> FO <sub>4</sub>                 |  |

|                 |     |                                                                |                                                                                       |
|-----------------|-----|----------------------------------------------------------------|---------------------------------------------------------------------------------------|
| M <sub>12</sub> | 206 | C <sub>10</sub> H <sub>7</sub> NO <sub>4</sub>                 | 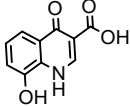   |
| M <sub>13</sub> | 234 | C <sub>12</sub> H <sub>11</sub> FN <sub>2</sub> O <sub>2</sub> |    |
| M <sub>14</sub> | 198 | C <sub>9</sub> H <sub>7</sub> FN <sub>2</sub> O <sub>2</sub>   |    |
| M <sub>15</sub> | 194 | C <sub>9</sub> H <sub>7</sub> FN <sub>2</sub> O <sub>2</sub>   |    |
| M <sub>16</sub> | 208 | C <sub>10</sub> H <sub>6</sub> FNO <sub>3</sub>                |    |
| M <sub>17</sub> | 161 | C <sub>9</sub> H <sub>7</sub> NO <sub>2</sub>                  |   |
| M <sub>18</sub> | 216 | C <sub>12</sub> H <sub>12</sub> N <sub>2</sub> O <sub>2</sub>  |  |
| M <sub>19</sub> | 177 | C <sub>12</sub> H <sub>12</sub> N <sub>2</sub> O <sub>2</sub>  |  |
| M <sub>20</sub> | 176 | C <sub>9</sub> H <sub>8</sub> N <sub>2</sub> O <sub>2</sub>    |  |
| M <sub>21</sub> | 165 | C <sub>8</sub> H <sub>5</sub> O <sub>4</sub> <sup>-</sup>      |  |
| M <sub>22</sub> | 137 | C <sub>7</sub> H <sub>6</sub> O <sub>3</sub>                   |  |
| M <sub>23</sub> | 110 | C <sub>6</sub> H <sub>6</sub> O <sub>2</sub>                   |  |

|                 |     |                                              |                                                                                     |
|-----------------|-----|----------------------------------------------|-------------------------------------------------------------------------------------|
| M <sub>24</sub> | 93  | C <sub>6</sub> H <sub>7</sub> N              | 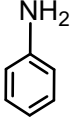 |
| M <sub>25</sub> | 116 | C <sub>4</sub> H <sub>4</sub> O <sub>4</sub> | HOOCCH=CHCOOH                                                                       |
| M <sub>26</sub> | 90  | C <sub>2</sub> H <sub>2</sub> O <sub>4</sub> | HOOC-COOH                                                                           |
| M <sub>27</sub> | 86  | C <sub>4</sub> H <sub>6</sub> O <sub>2</sub> | CH <sub>2</sub> =CHCH <sub>2</sub> COOH                                             |
| M <sub>28</sub> | 84  | C <sub>4</sub> H <sub>4</sub> O <sub>2</sub> | CH≡CCH <sub>2</sub> COOH                                                            |
| M <sub>29</sub> | 70  | C <sub>4</sub> H <sub>6</sub> O              | CH <sub>2</sub> =CHCH <sub>2</sub> CHO                                              |
| M <sub>30</sub> | 68  | C <sub>4</sub> H <sub>4</sub> O              | CH≡CCH <sub>2</sub> CHO                                                             |
| M <sub>31</sub> | 56  | C <sub>3</sub> H <sub>4</sub> O              | CH <sub>2</sub> =CHCHO                                                              |

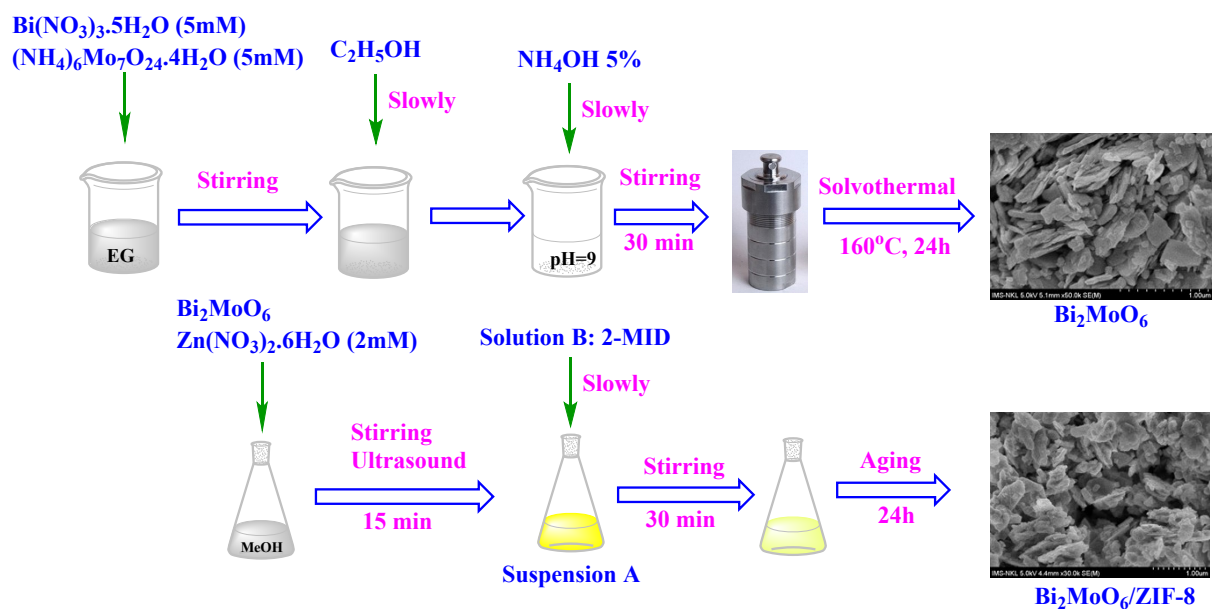

Figure S1. Procedure for synthesis of BIZ heterojunction

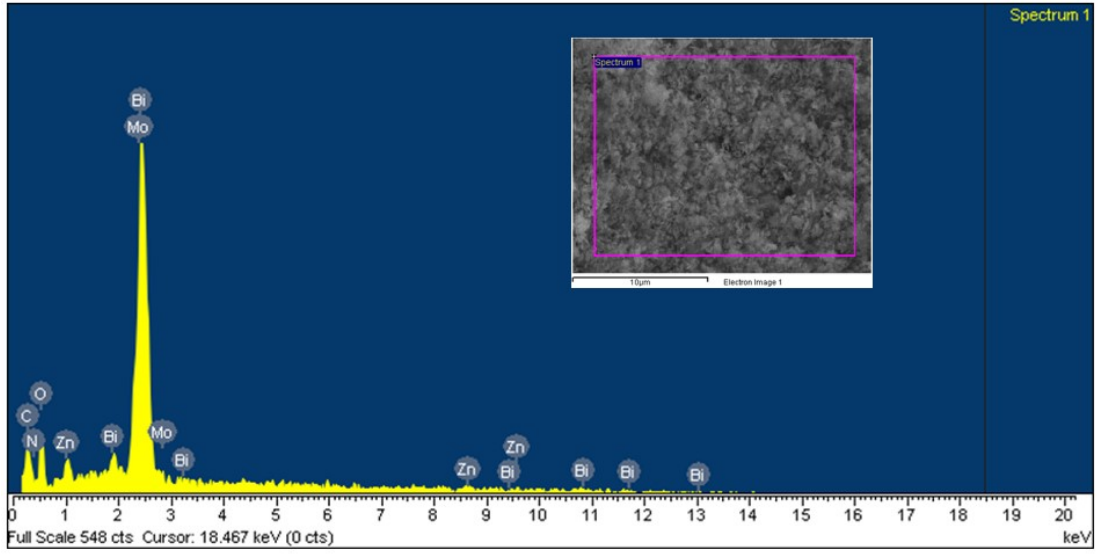

Figure S2. The EDX result of the BIZ heterojunction

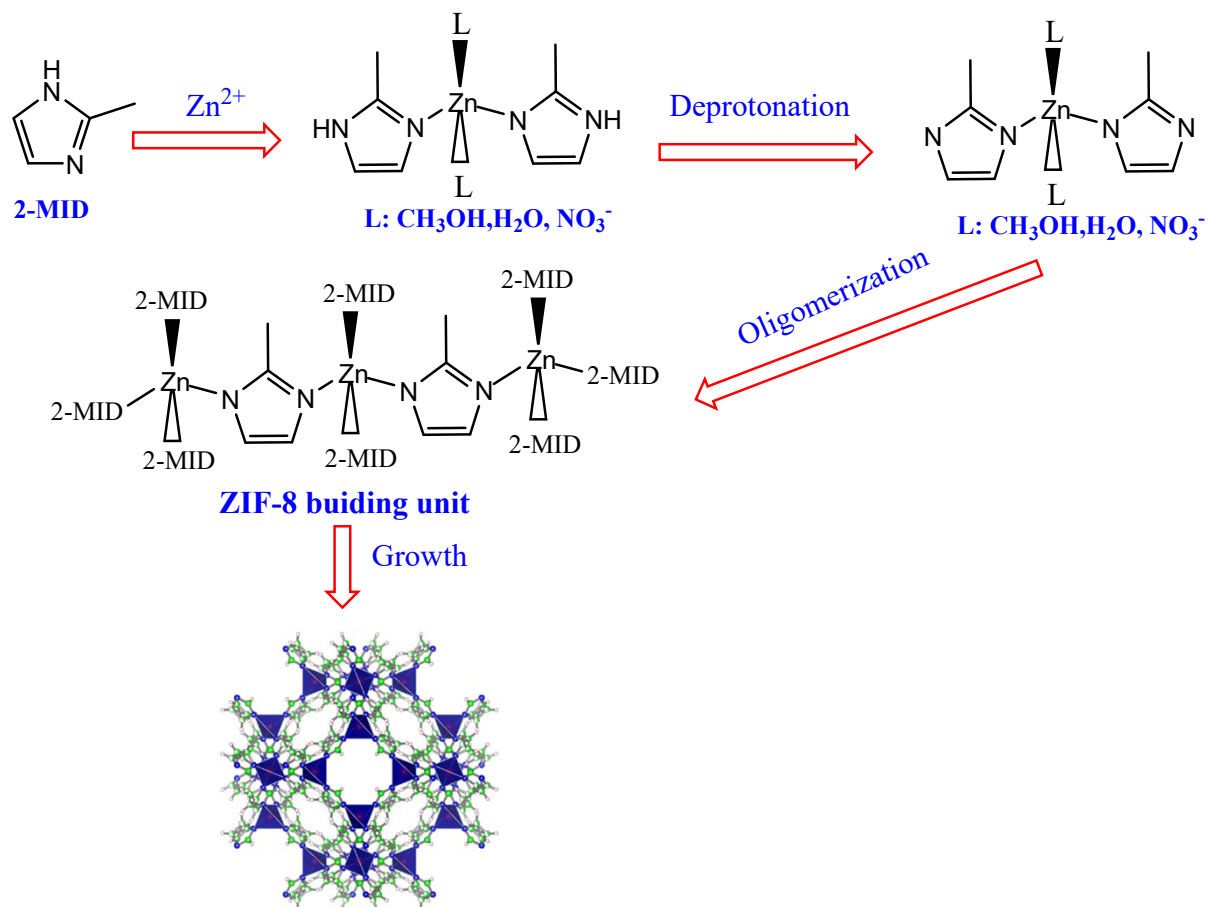

Figure S3. Proposed mechanism for the formation of ZIF-8 material

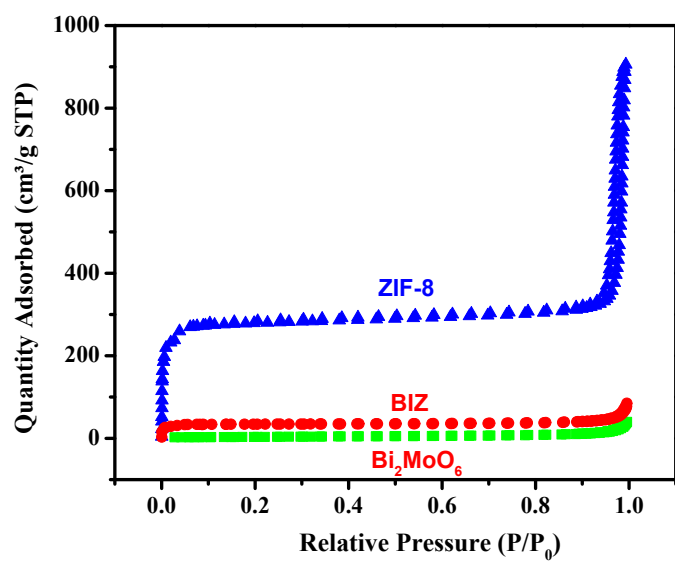

Figure S4. The N<sub>2</sub> adsorption-desorption isotherms of Bi<sub>2</sub>MoO<sub>6</sub>, ZIF-8, and BIZ materials



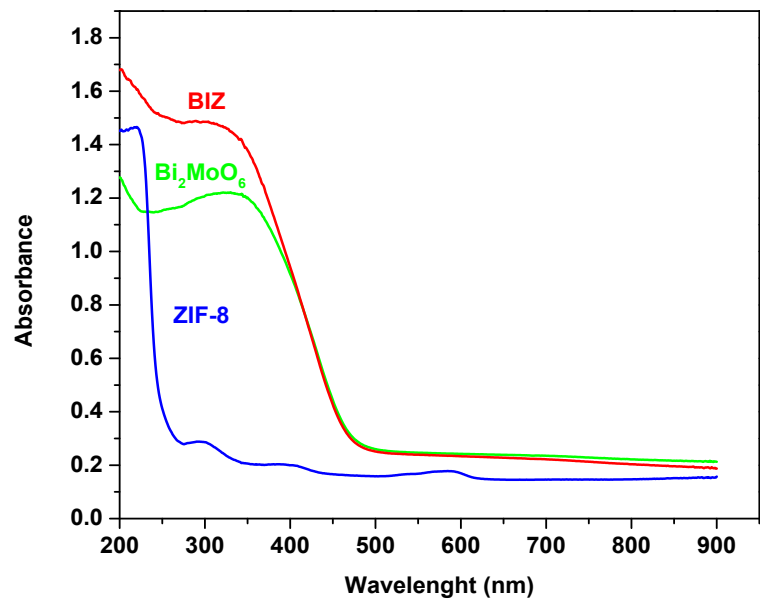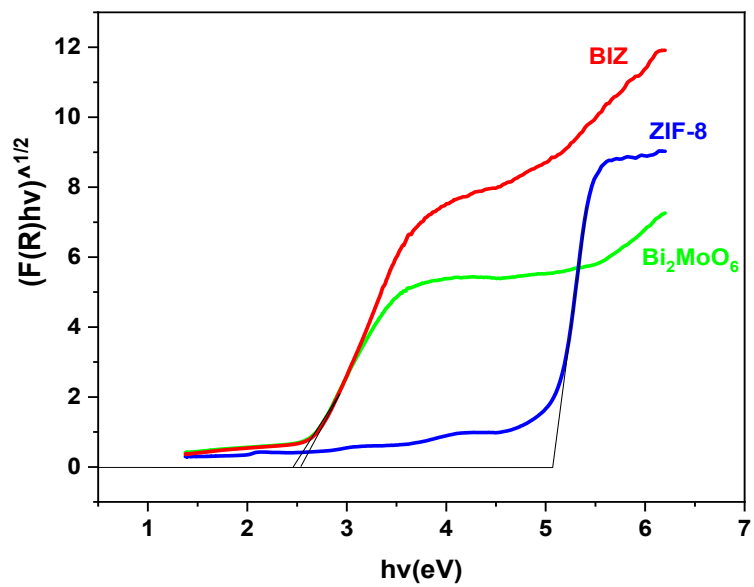

Figure S5. UV-Vis DRS spectra of Bi<sub>2</sub>MoO<sub>6</sub>, ZIF-8, and BIZ materials

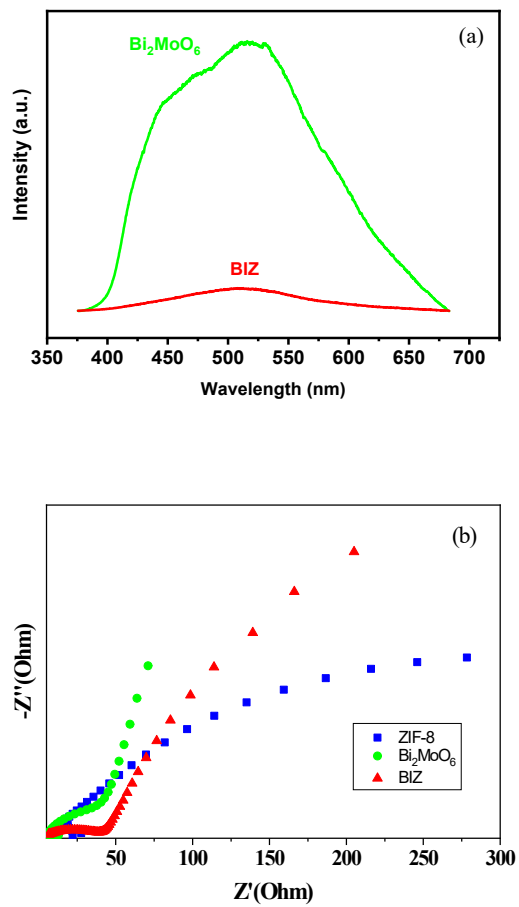

Figure S6. (a) PL spectra of pure  $\text{Bi}_2\text{MoO}_6$  and BIZ heterojunction, and (b) EIS Nyquist plots of ZIF-8,  $\text{Bi}_2\text{MoO}_6$ , and BIZ

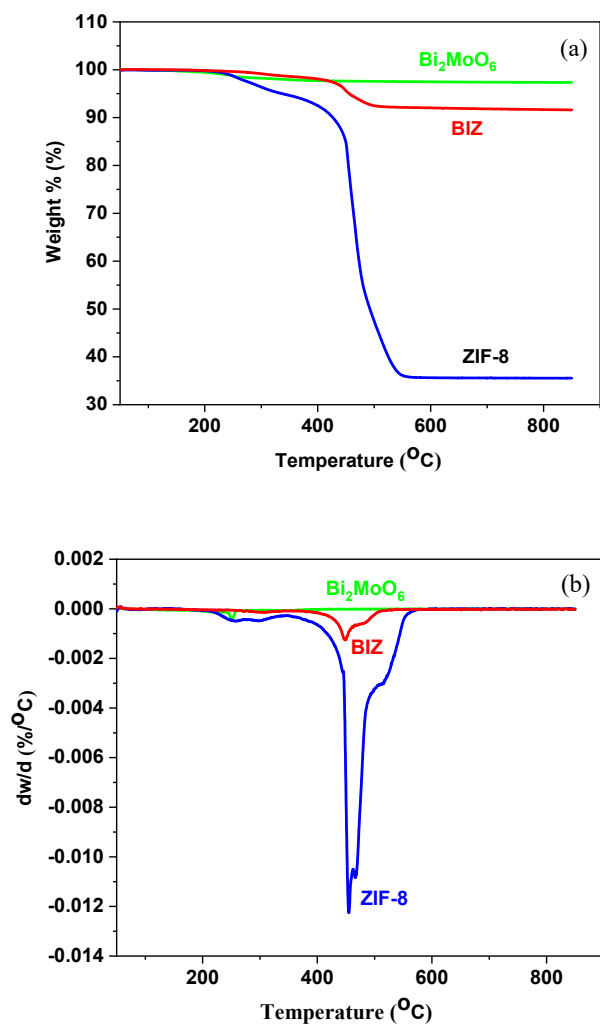

Figure S7. (a) TG and (b) DTG results of Bi<sub>2</sub>MoO<sub>6</sub>, ZIF-8, and BIZ materials

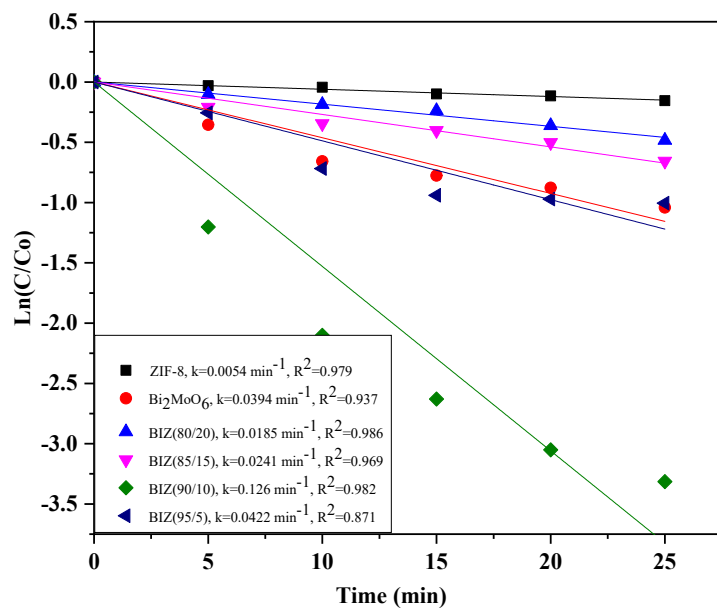

Figure S8. Photocatalytic decomposition rates of OFX by different BIZ materials (n = 3)

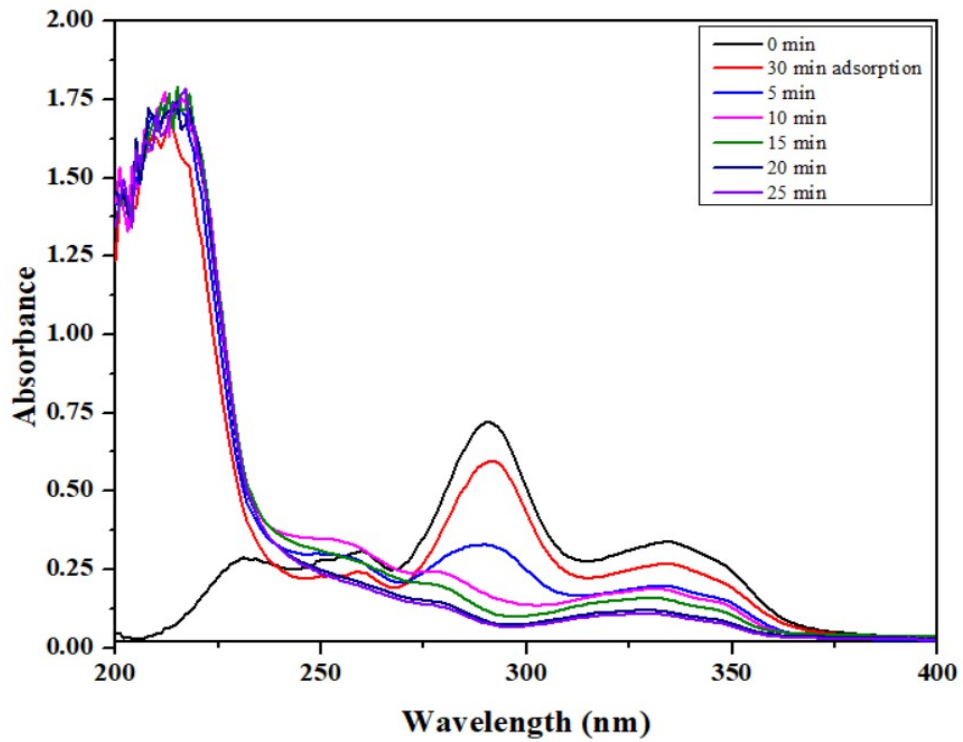

Figure S9. UV-Vis spectra of OFX during 30 min of adsorption and then 25 min of photocatalysis

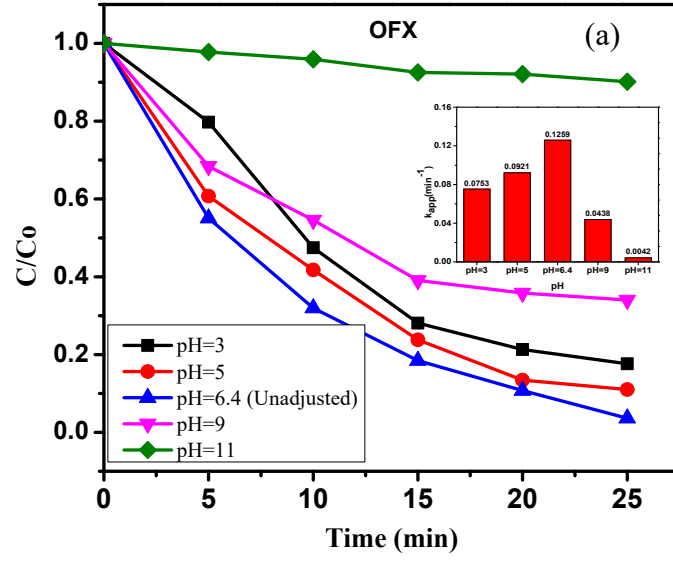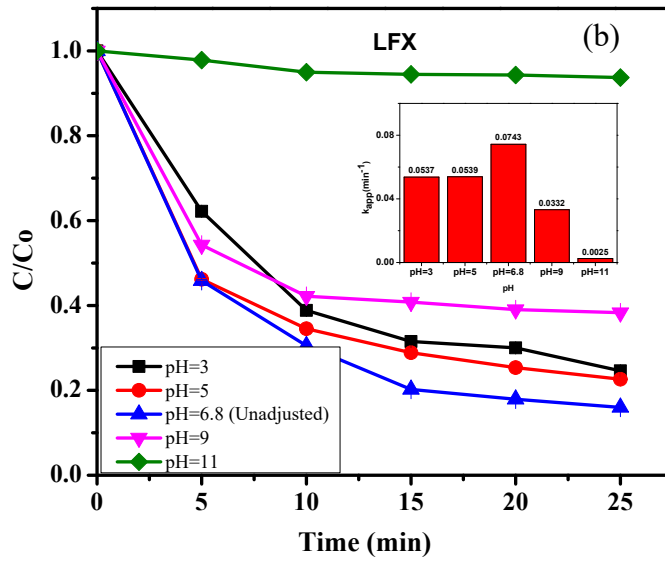

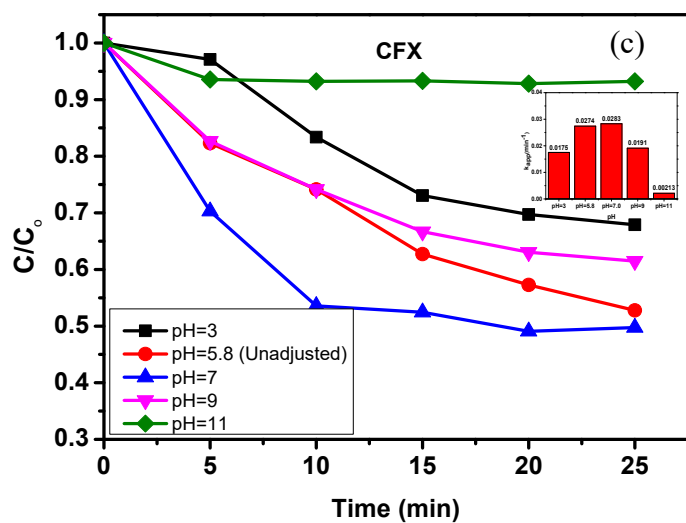

Figure S10. Effects of initial pH on the photocatalytic removal efficiency of (a) OFX, (b) LFX, and (c) CFX (Insets are the pseudo-first-order reaction rate constants at different pH)

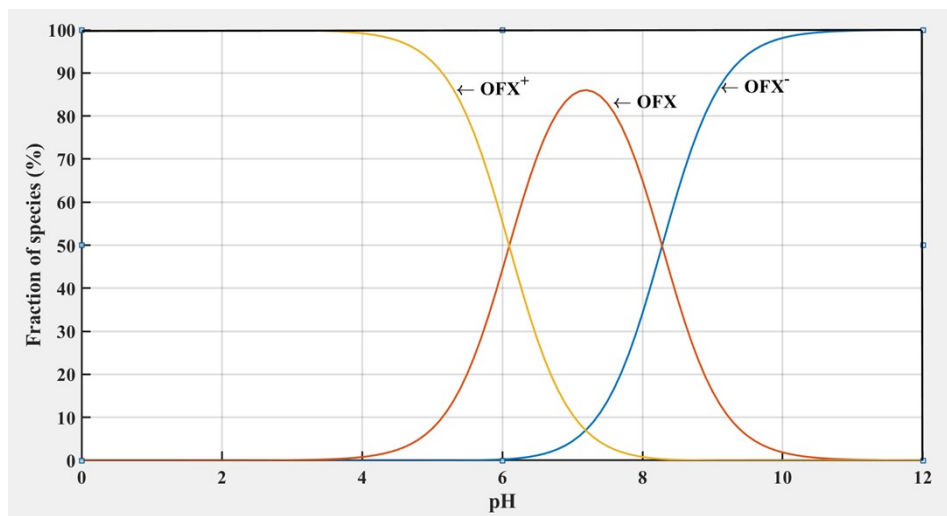

Figure S11. Specification of ofloxacin as a function of pH value in aqueous solution



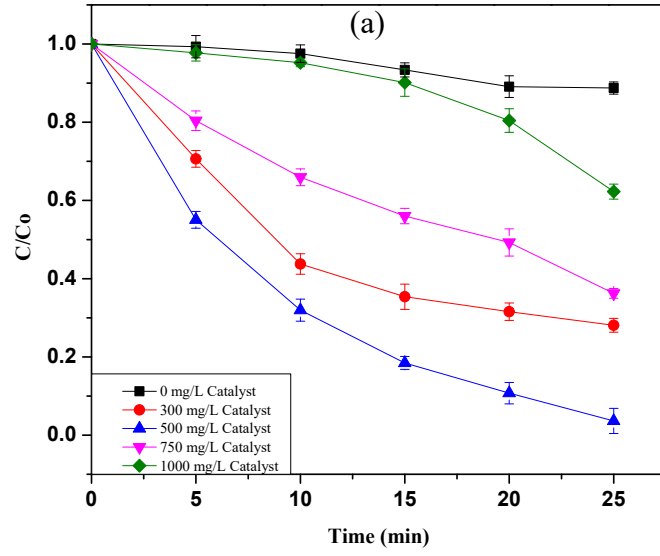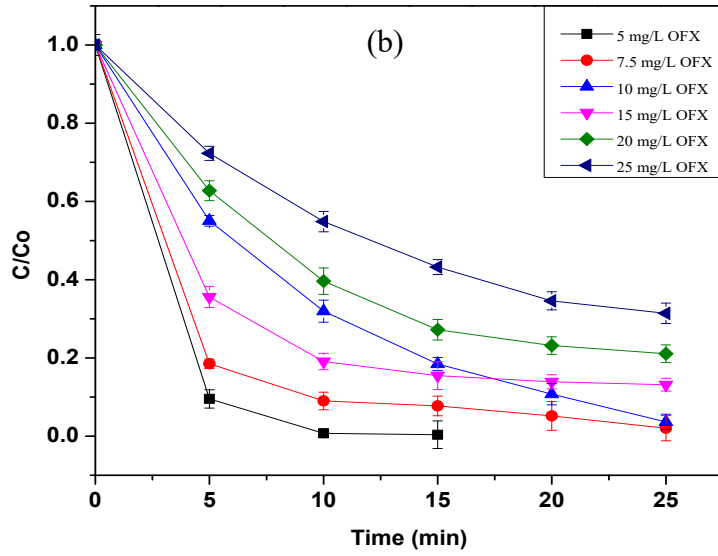

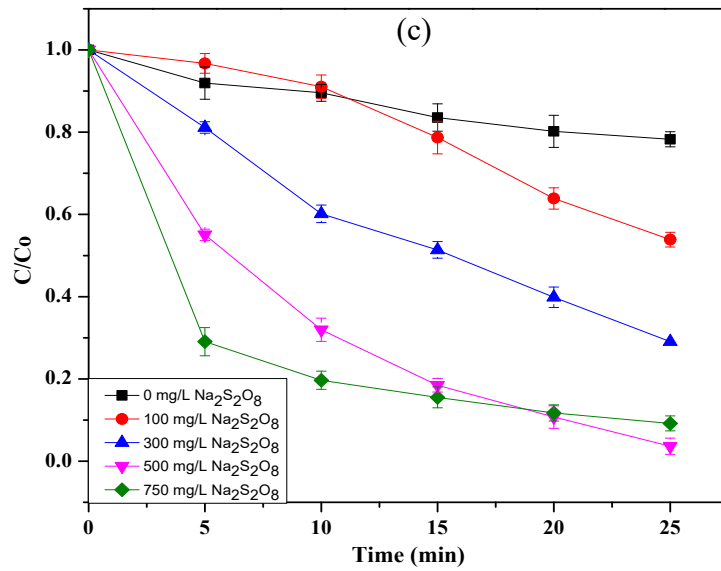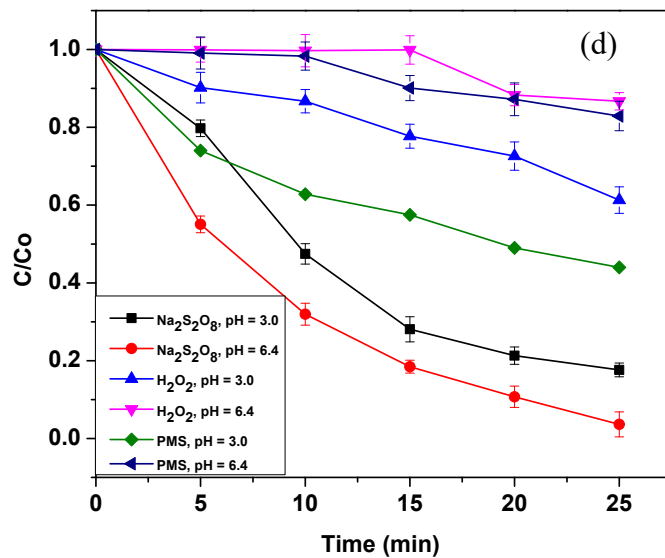

Figure S12. Effects of (a) photocatalyst dosage, (b) OFX concentration, (c)  $\text{Na}_2\text{S}_2\text{O}_8$  concentration, and (d) oxidant on the photocatalytic removal efficiency of OFX (n = 3)

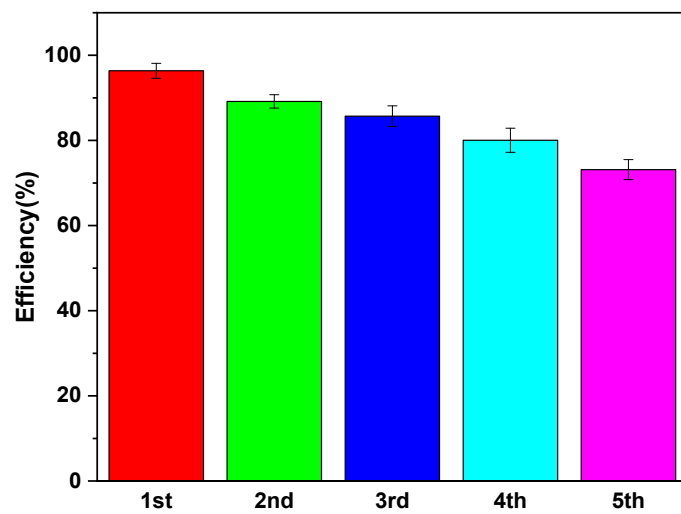

Figure S13. The degradation of OFX after 5 cycles of the photocatalytic experiment (n = 3)

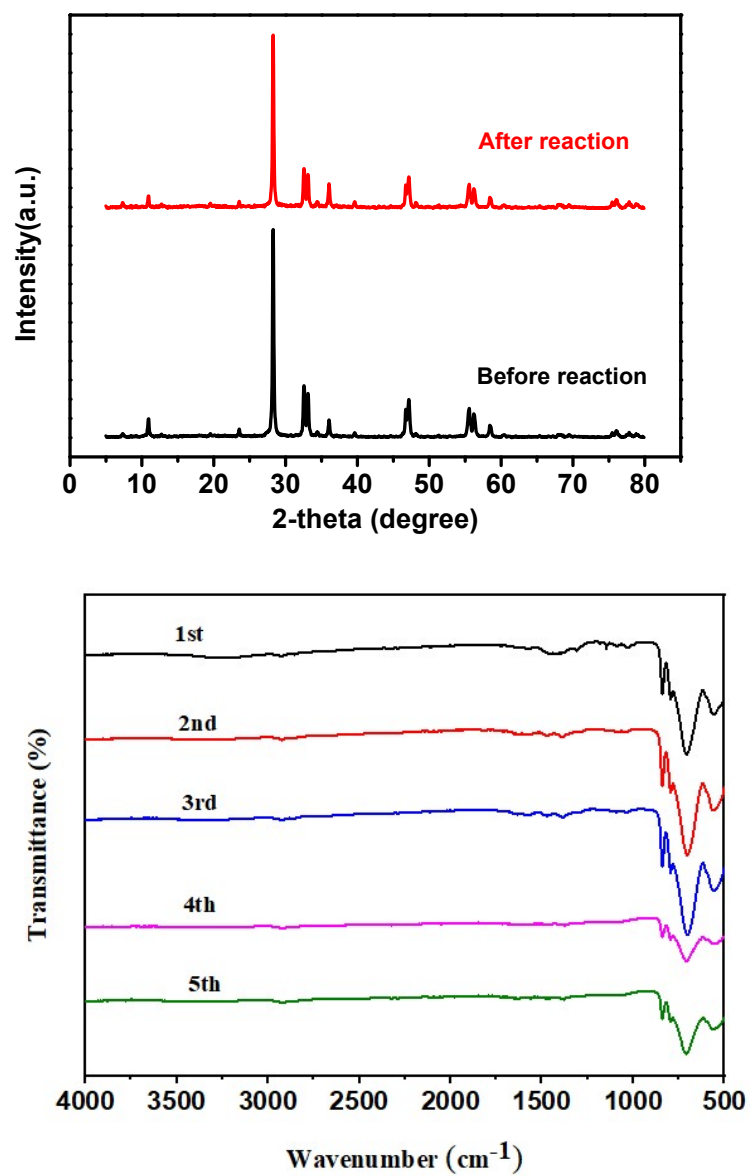

Figure S14. (a) XRD patterns of the BIZ material before and after five cycles of experiment and (b) FTIR spectra of BIZ material after each cycles of experiment

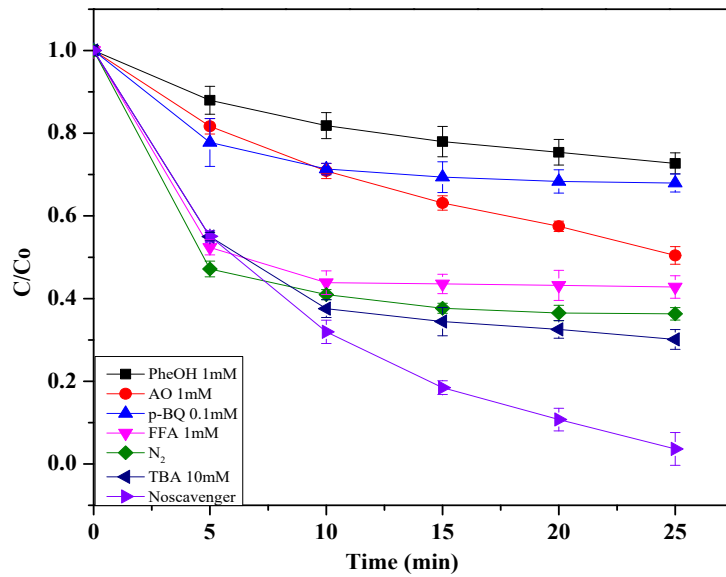

Figure S15. Effect of scavengers on the photocatalytic removal efficiency of OFX (n = 3)

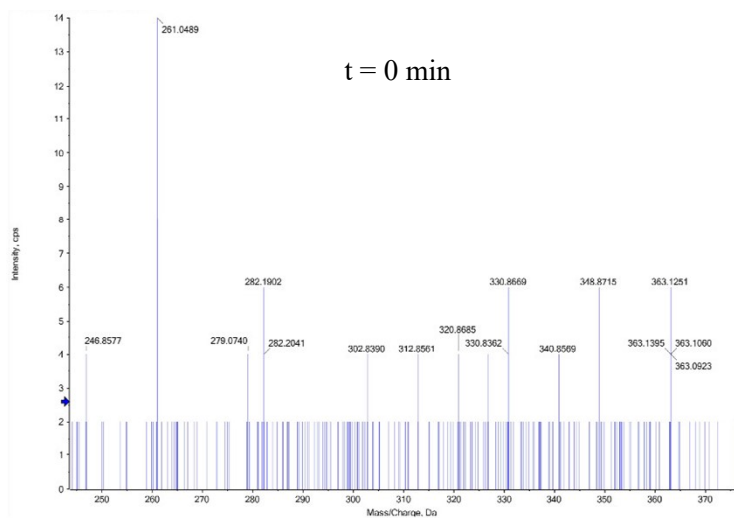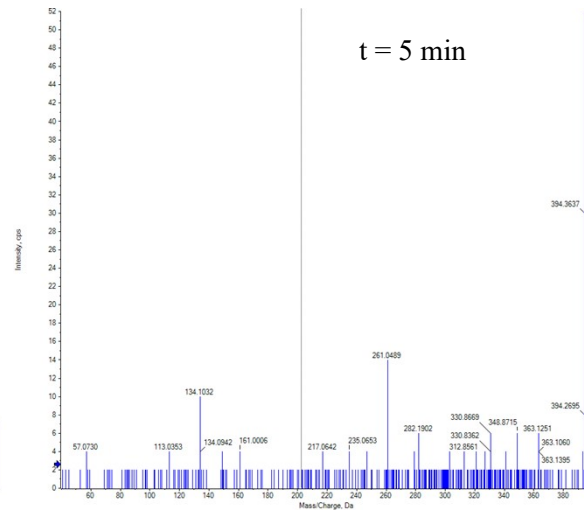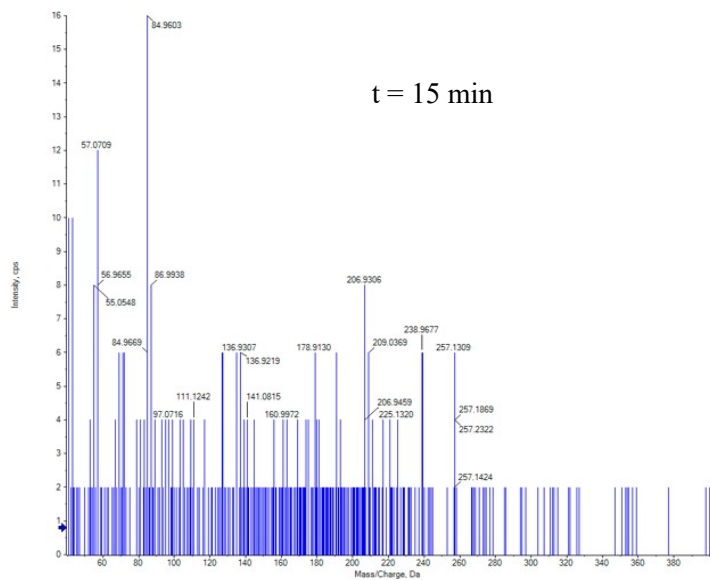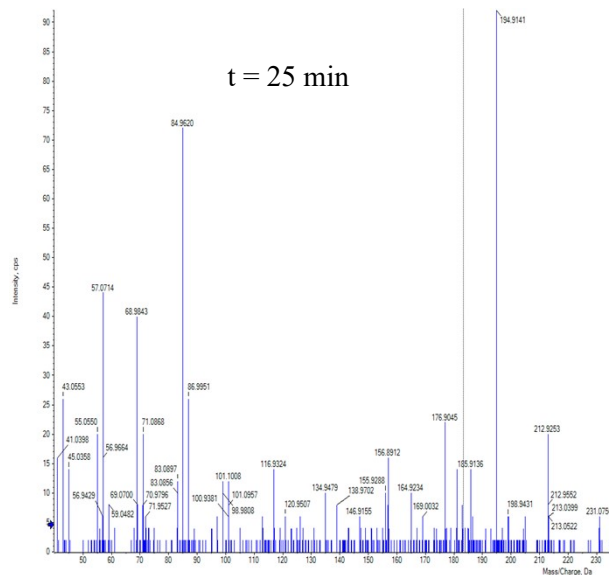

Figure S16. MS results of OFX solution during the reaction time
